# Supplementary material for: In Vitro and In Vivo Inhibitory Effects of Gaseous Chlorine Dioxide Against Diaporthe batatas Isolated from Stored Sweetpotato
Source: PubMed Central journal article supplement — Plant Pathol J. 2019 Feb 1;35(1):77–83. doi: 10.5423/PPJ.OA.09.2018.0184 (PMC6385651; doi:10.5423/ppj.oa.09.2018.0184), 2019-02-01
Supplement: ppj-35-077_suppl.pdf [file ppj-35-077_suppl.pdf]

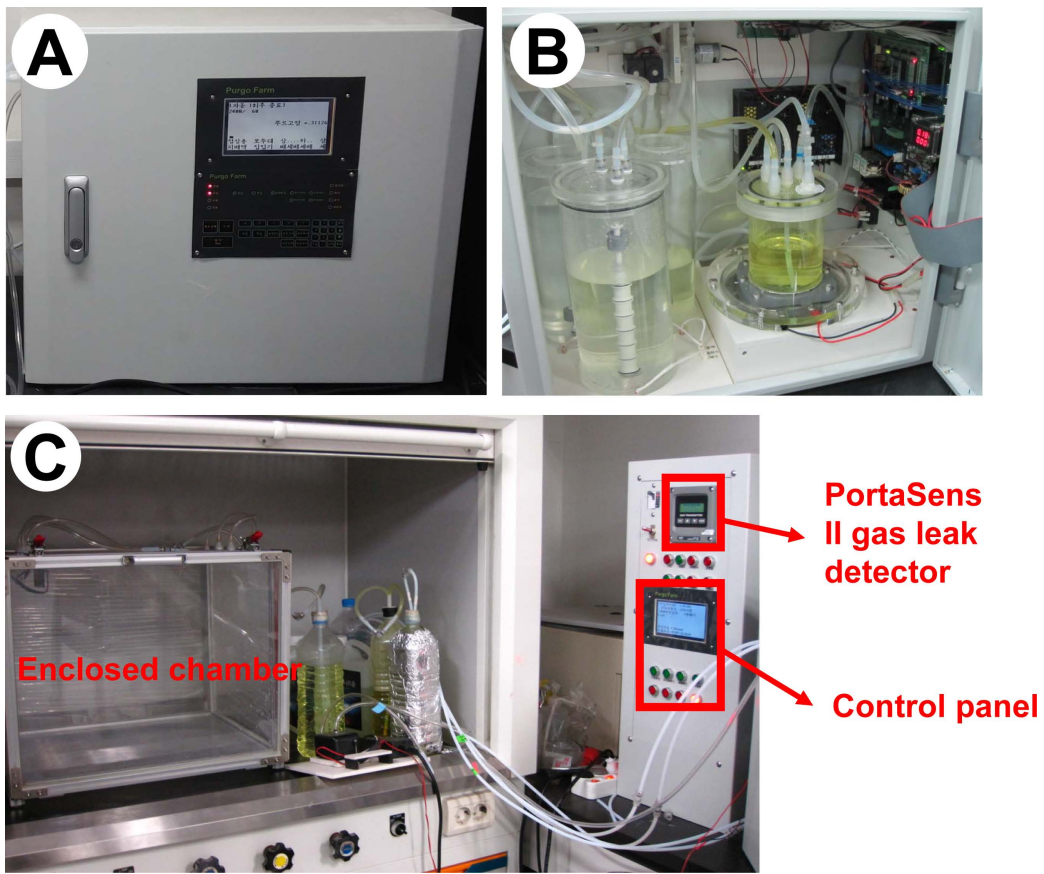

**Supplementary Fig. 1.** The chlorine dioxide gas generator and fumigation system. (A) Outside and (B) inside of the electrochemical ClO<sub>2</sub> gas generator and (C) ClO<sub>2</sub> gas fumigation system including the enclosed chamber and gas concentration detector used in this study.

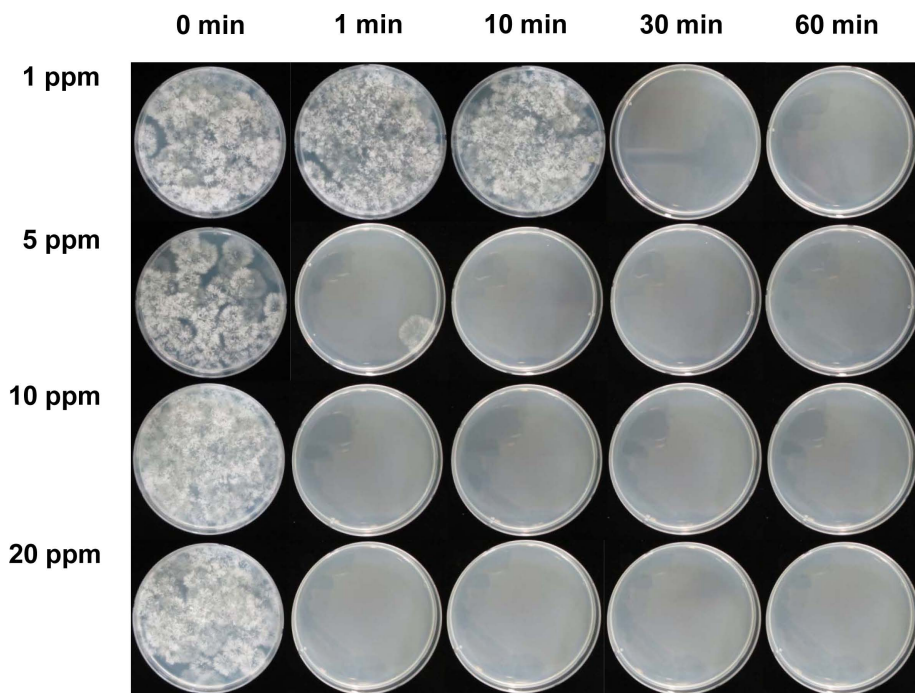

**Supplementary Fig. 2.** Populations of *Diaporthe batatas* SP-d1 on potato dextrose agar (PDA) treated with gaseous ClO<sub>2</sub>. Isolate SP-d1 (200  $\mu$ l of  $5 \times 10^3$  spores/ml) was spread on acidified PAD and then treated with various ClO<sub>2</sub> concentrations (1, 5, 10, and 20 ppm) for 0, 1, 10, 30, and 60 min. The photographs were taken 3 days after gas treatments.
